# Supplementary material for: Middle-Aged Offspring’s Support to Aging Parents With Emerging Disability
Source: Oxford University Press journal article supplement (doi:10.1093/geront/gnv686), 2016-02-18
Supplement: gnv686_suppl_supplementary_tables.docx [file gnv686_suppl_supplementary_tables.docx]

SUPPLEMENTARY

TABLES

Supplementary Table 1

*Multilevel Models for Practical Assistance at Wave 2 with Parent Disability Changes and Other Informal and Paid Help*

|  | Model 1 | | |  | Model 2 | | |  | Model 3 | | |
| --- | --- | --- | --- | --- | --- | --- | --- | --- | --- | --- | --- |
|  | Estimate | | (*SE*) |  | Estimate | | (*SE*) |  | Estimate | | (*SE*) |
| **Fixed effects** |  |  |  |  |  |  |  |  |  |  |  |
| Intercept | -0.40 |  | (1.25) |  | -0.69 |  | (1.26) |  | -0.68 |  | (1.27) |
| Parent ADL changes (at wave 2) | 0.18 | ** | (0.06) |  | 0.10 |  | (0.07) |  | 0.04 |  | (0.09) |
| Other help with parent ADL needs |  |  |  |  |  |  |  |  |  |  |  |
| Family members |  |  |  |  | 0.47 | ** | (0.17) |  | 0.36 |  | (0.21) |
| Friends or neighbors |  |  |  |  | 0.25 |  | (0.40) |  | 0.40 |  | (0.70) |
| Paid help |  |  |  |  | -0.41 |  | (0.25) |  | -0.61 |  | (0.37) |
| Interactions of parent ADL changes |  |  |  |  |  |  |  |  |  |  |  |
| × Family members |  |  |  |  |  |  |  |  | 0.11 |  | (0.12) |
| × Friends or neighbors |  |  |  |  |  |  |  |  | -0.10 |  | (0.47) |
| × Paid help |  |  |  |  |  |  |  |  | 0.10 |  | (0.16) |
| *Controls* |  |  |  |  |  |  |  |  |  |  |  |
| Parent ADL needs (at wave 1) | 0.07 |  | (0.07) |  | 0.01 |  | (0.08) |  | 0.04 |  | (0.08) |
| Practical assistance (at wave 1) | 0.42 | *** | (0.04) |  | 0.42 | *** | (0.04) |  | 0.42 | *** | (0.04) |
| Demographics |  |  |  |  |  |  |  |  |  |  |  |
| Child: Female | 0.02 |  | (0.16) |  | 0.03 |  | (0.16) |  | 0.02 |  | (0.16) |
| Child: Years of education | 0.01 |  | (0.04) |  | 0.02 |  | (0.04) |  | 0.02 |  | (0.04) |
| Child: Re/married | 0.20 |  | (0.18) |  | 0.22 |  | (0.18) |  | 0.22 |  | (0.18) |
| Child: Employed for pay | -0.14 |  | (0.17) |  | -0.11 |  | (0.17) |  | -0.11 |  | (0.17) |
| Child: Racial/ethnic minority | 0.15 |  | (0.19) |  | 0.12 |  | (0.19) |  | 0.12 |  | (0.19) |
| Child: Number of children | 0.09 |  | (0.05) |  | 0.09 |  | (0.05) |  | 0.08 |  | (0.05) |
| Child: Number of siblings | -0.00 |  | (0.04) |  | -0.01 |  | (0.04) |  | -0.01 |  | (0.04) |
| Parent: Female | 0.44 | ** | (0.14) |  | 0.41 | ** | (0.13) |  | 0.41 | ** | (0.13) |
| Parent: Age | 0.02 |  | (0.01) |  | 0.02 |  | (0.01) |  | 0.02 |  | (0.01) |
| Parent: Years of education | 0.07 | * | (0.03) |  | 0.07 | * | (0.03) |  | 0.07 | * | (0.03) |
| Parent: Re/married | 0.15 |  | (0.17) |  | 0.13 |  | (0.17) |  | 0.14 |  | (0.17) |
| Parent: Coresiding with respondent | 1.14 | *** | (0.29) |  | 1.19 | *** | (0.29) |  | 1.20 | *** | (0.29) |
| Parent: Distance from respondenta | -0.52 | *** | (0.09) |  | -0.51 | *** | (0.09) |  | -0.51 | *** | (0.09) |
| **Random effects** |  |  |  |  |  |  |  |  |  |  |  |
| Intercept variance | 1.12 | *** | (0.19) |  | 1.18 | *** | (0.19) |  | 1.19 | *** | (0.19) |
| Residual variance | 1.07 | *** | (0.15) |  | 0.99 | *** | (0.14) |  | 0.98 | *** | (0.14) |
| -2 log-likelihood | 1,650.1 | | |  | 1,641.4 | | |  | 1,643.9 | | |

*Note.* Child (respondent) *N* = 380; Parent *N* = 487. ADL = activities of daily living.

aLog-transformed miles.

**p* < .05. ***p* < .01. ****p* < .001.

Supplementary Table 2

*Multilevel Models for Financial Support at Wave 2 with Parent Disability Changes and Other Informal and Paid Help*

|  | Model 1 | | |  | Model 2 | | |  | Model 3 | | |
| --- | --- | --- | --- | --- | --- | --- | --- | --- | --- | --- | --- |
|  | Estimate | | (*SE*) |  | Estimate | | (*SE*) |  | Estimate | | (*SE*) |
| **Fixed effects** |  |  |  |  |  |  |  |  |  |  |  |
| Intercept | 1.73 |  | (1.05) |  | 1.26 |  | (1.05) |  | 1.19 |  | (1.05) |
| Parent ADL changes (at wave 2) | 0.11 | ** | (0.04) |  | 0.15 | ** | (0.05) |  | 0.15 | * | (0.06) |
| Other help with parent ADL needs |  |  |  |  |  |  |  |  |  |  |  |
| Family members |  |  |  |  | -0.13 |  | (0.13) |  | -0.09 |  | (0.15) |
| Friends or neighbors |  |  |  |  | 0.82 |  | (0.42) |  | 0.62 |  | (0.56) |
| Paid help |  |  |  |  | -0.41 | * | (0.19) |  | -0.67 | * | (0.28) |
| Interactions of parent ADL changes |  |  |  |  |  |  |  |  |  |  |  |
| × Family members |  |  |  |  |  |  |  |  | -0.04 |  | (0.08) |
| × Friends or neighbors |  |  |  |  |  |  |  |  | 0.19 |  | (0.37) |
| × Paid help |  |  |  |  |  |  |  |  | 0.15 |  | (0.12) |
| *Controls* |  |  |  |  |  |  |  |  |  |  |  |
| Parent ADL needs (at wave 1) | 0.01 |  | (0.05) |  | 0.07 |  | (0.06) |  | 0.07 |  | (0.06) |
| Financial support (at wave 1) | 0.46 | *** | (0.04) |  | 0.45 | *** | (0.04) |  | 0.45 | *** | (0.04) |
| Demographics |  |  |  |  |  |  |  |  |  |  |  |
| Child: Female | 0.06 |  | (0.14) |  | 0.05 |  | (0.14) |  | 0.05 |  | (0.14) |
| Child: Years of education | -0.03 |  | (0.04) |  | -0.02 |  | (0.04) |  | -0.02 |  | (0.04) |
| Child: Re/married | -0.05 |  | (0.16) |  | -0.03 |  | (0.16) |  | -0.04 |  | (0.16) |
| Child: Employed for pay | 0.21 |  | (0.15) |  | 0.22 |  | (0.15) |  | 0.22 |  | (0.15) |
| Child: Racial/ethnic minority | -0.02 |  | (0.17) |  | 0.00 |  | (0.16) |  | 0.01 |  | (0.16) |
| Child: Number of children | -0.06 |  | (0.05) |  | -0.05 |  | (0.05) |  | -0.05 |  | (0.05) |
| Child: Number of siblings | -0.01 |  | (0.03) |  | -0.01 |  | (0.03) |  | -0.01 |  | (0.03) |
| Parent: Female | 0.19 | * | (0.08) |  | 0.21 | * | (0.08) |  | 0.20 | * | (0.08) |
| Parent: Age | 0.00 |  | (0.01) |  | 0.01 |  | (0.01) |  | 0.01 |  | (0.01) |
| Parent: Years of education | -0.01 |  | (0.02) |  | -0.01 |  | (0.02) |  | -0.01 |  | (0.02) |
| Parent: Re/married | -0.14 |  | (0.13) |  | -0.11 |  | (0.13) |  | -0.11 |  | (0.13) |
| Parent: Coresiding with respondent | 0.89 | *** | (0.23) |  | 0.82 | *** | (0.23) |  | 0.80 | *** | (0.23) |
| Parent: Distance from respondenta | -0.16 | * | (0.07) |  | -0.18 | ** | (0.07) |  | -0.18 | ** | (0.07) |
| **Random effects** |  |  |  |  |  |  |  |  |  |  |  |
| Intercept variance | 1.35 | *** | (0.14) |  | 1.29 | *** | (0.13) |  | 1.28 | *** | (0.13) |
| Residual variance | 0.29 | *** | (0.05) |  | 0.29 | *** | (0.05) |  | 0.30 | *** | (0.05) |
| -2 log-likelihood | 1,445.3 | | |  | 1,436.3 | | |  | 1,440.1 | | |

*Note.* Child (respondent) *N* = 380; Parent *N* = 487. ADL = activities of daily living.

aLog-transformed miles.

**p* < .05. ***p* < .01. ****p* < .001.

Supplementary Table 3

*Multilevel Models for Emotional Support at Wave 2 with Parent Disability Changes and Other Informal and Paid Help*

|  | Model 1 | | |  | Model 2 | | |  | Model 3 | | |
| --- | --- | --- | --- | --- | --- | --- | --- | --- | --- | --- | --- |
|  | Estimate | | (*SE*) |  | Estimate | | (*SE*) |  | Estimate | | (*SE*) |
| **Fixed effects** |  |  |  |  |  |  |  |  |  |  |  |
| Intercept | -0.90 |  | (1.53) |  | -1.43 |  | (1.55) |  | -1.62 |  | (1.56) |
| Parent ADL changes (at wave 2) | 0.13 |  | (0.07) |  | 0.21 | * | (0.09) |  | 0.30 | * | (0.12) |
| Other help with parent ADL needs |  |  |  |  |  |  |  |  |  |  |  |
| Family members |  |  |  |  | -0.16 |  | (0.22) |  | 0.02 |  | (0.25) |
| Friends or neighbors |  |  |  |  | 0.49 |  | (0.50) |  | 0.55 |  | (0.86) |
| Paid help |  |  |  |  | -0.67 | * | (0.32) |  | -0.84 |  | (0.46) |
| Interactions of parent ADL changes |  |  |  |  |  |  |  |  |  |  |  |
| × Family members |  |  |  |  |  |  |  |  | -0.21 |  | (0.15) |
| × Friends or neighbors |  |  |  |  |  |  |  |  | -0.07 |  | (0.57) |
| × Paid help |  |  |  |  |  |  |  |  | 0.11 |  | (0.20) |
| *Controls* |  |  |  |  |  |  |  |  |  |  |  |
| Parent ADL needs (at wave 1) | -0.04 |  | (0.09) |  | 0.04 |  | (0.10) |  | 0.02 |  | (0.10) |
| Emotional support (at wave 1) | 0.46 | *** | (0.05) |  | 0.47 | *** | (0.05) |  | 0.47 | *** | (0.05) |
| Demographics |  |  |  |  |  |  |  |  |  |  |  |
| Child: Female | 0.21 |  | (0.19) |  | 0.20 |  | (0.19) |  | 0.20 |  | (0.19) |
| Child: Years of education | -0.00 |  | (0.05) |  | 0.01 |  | (0.05) |  | 0.01 |  | (0.05) |
| Child: Re/married | 0.40 |  | (0.22) |  | 0.43 |  | (0.22) |  | 0.43 | * | (0.22) |
| Child: Employed for pay | 0.14 |  | (0.21) |  | 0.17 |  | (0.21) |  | 0.15 |  | (0.21) |
| Child: Racial/ethnic minority | 0.19 |  | (0.23) |  | 0.21 |  | (0.23) |  | 0.22 |  | (0.23) |
| Child: Number of children | 0.03 |  | (0.06) |  | 0.04 |  | (0.06) |  | 0.05 |  | (0.06) |
| Child: Number of siblings | -0.04 |  | (0.04) |  | -0.04 |  | (0.04) |  | -0.04 |  | (0.04) |
| Parent: Female | 0.60 | *** | (0.17) |  | 0.61 | *** | (0.17) |  | 0.60 | *** | (0.17) |
| Parent: Age | 0.03 |  | (0.02) |  | 0.03 | * | (0.02) |  | 0.04 | * | (0.02) |
| Parent: Years of education | 0.01 |  | (0.04) |  | 0.02 |  | (0.04) |  | 0.02 |  | (0.04) |
| Parent: Re/married | -0.26 |  | (0.20) |  | -0.25 |  | (0.20) |  | -0.25 |  | (0.20) |
| Parent: Coresiding with respondent | 1.34 | *** | (0.35) |  | 1.32 | *** | (0.35) |  | 1.33 | *** | (0.36) |
| Parent: Distance from respondenta | -0.15 |  | (0.10) |  | -0.16 |  | (0.10) |  | -0.15 |  | (0.10) |
| **Random effects** |  |  |  |  |  |  |  |  |  |  |  |
| Intercept variance | 1.58 | *** | (0.29) |  | 1.62 | *** | (0.29) |  | 1.63 | *** | (0.29) |
| Residual variance | 1.64 | *** | (0.23) |  | 1.60 | *** | (0.23) |  | 1.59 | *** | (0.23) |
| -2 log-likelihood | 1,803.7 | | |  | 1,799.2 | | |  | 1,799.6 | | |

*Note.* Child (respondent) *N* = 380; Parent *N* = 487. ADL = activities of daily living.

aLog-transformed miles.

**p* < .05. ***p* < .01. ****p* < .001.

Supplementary Table 4

*Multilevel Models for Advice at Wave 2 with Parent Disability Changes and Other Informal and Paid Help*

|  | Model 1 | | |  | Model 2 | | |  | Model 3 | | |
| --- | --- | --- | --- | --- | --- | --- | --- | --- | --- | --- | --- |
|  | Estimate | | (*SE*) |  | Estimate | | (*SE*) |  | Estimate | | (*SE*) |
| **Fixed effects** |  |  |  |  |  |  |  |  |  |  |  |
| Intercept | 1.40 |  | (1.44) |  | 1.19 |  | (1.45) |  | 1.17 |  | (1.46) |
| Parent ADL changes (at wave 2) | 0.17 | * | (0.07) |  | 0.19 | * | (0.08) |  | 0.22 | * | (0.11) |
| Other help with parent ADL needs |  |  |  |  |  |  |  |  |  |  |  |
| Family members |  |  |  |  | -0.02 |  | (0.21) |  | 0.03 |  | (0.25) |
| Friends or neighbors |  |  |  |  | 0.79 |  | (0.47) |  | 0.90 |  | (0.83) |
| Paid help |  |  |  |  | -0.31 |  | (0.30) |  | -0.23 |  | (0.45) |
| Interactions of parent ADL changes |  |  |  |  |  |  |  |  |  |  |  |
| × Family members |  |  |  |  |  |  |  |  | -0.05 |  | (0.14) |
| × Friends or neighbors |  |  |  |  |  |  |  |  | -0.10 |  | (0.54) |
| × Paid help |  |  |  |  |  |  |  |  | -0.04 |  | (0.19) |
| *Controls* |  |  |  |  |  |  |  |  |  |  |  |
| Parent ADL needs (at wave 1) | -0.02 |  | (0.08) |  | 0.01 |  | (0.10) |  | -0.00 |  | (0.10) |
| Advice (at wave 1) | 0.54 | *** | (0.05) |  | 0.54 | *** | (0.05) |  | 0.54 | *** | (0.05) |
| Demographics |  |  |  |  |  |  |  |  |  |  |  |
| Child: Female | -0.09 |  | (0.18) |  | -0.10 |  | (0.17) |  | -0.11 |  | (0.18) |
| Child: Years of education | -0.03 |  | (0.05) |  | -0.02 |  | (0.05) |  | -0.02 |  | (0.05) |
| Child: Re/married | 0.11 |  | (0.20) |  | 0.13 |  | (0.20) |  | 0.13 |  | (0.20) |
| Child: Employed for pay | 0.16 |  | (0.20) |  | 0.18 |  | (0.20) |  | 0.17 |  | (0.20) |
| Child: Racial/ethnic minority | 0.25 |  | (0.21) |  | 0.26 |  | (0.21) |  | 0.26 |  | (0.21) |
| Child: Number of children | 0.04 |  | (0.06) |  | 0.05 |  | (0.06) |  | 0.05 |  | (0.06) |
| Child: Number of siblings | -0.04 |  | (0.04) |  | -0.04 |  | (0.04) |  | -0.04 |  | (0.04) |
| Parent: Female | 0.29 |  | (0.17) |  | 0.29 |  | (0.17) |  | 0.29 |  | (0.17) |
| Parent: Age | -0.00 |  | (0.02) |  | -0.00 |  | (0.02) |  | -0.00 |  | (0.02) |
| Parent: Years of education | 0.07 | * | (0.03) |  | 0.07 | * | (0.03) |  | 0.07 | * | (0.03) |
| Parent: Re/married | -0.16 |  | (0.19) |  | -0.13 |  | (0.19) |  | -0.13 |  | (0.19) |
| Parent: Coresiding with respondent | 1.00 | ** | (0.34) |  | 0.98 | ** | (0.34) |  | 0.99 | ** | (0.34) |
| Parent: Distance from respondenta | -0.27 | ** | (0.10) |  | -0.29 | ** | (0.10) |  | -0.28 | ** | (0.10) |
| **Random effects** |  |  |  |  |  |  |  |  |  |  |  |
| Intercept variance | 1.00 | *** | (0.30) |  | 0.95 | *** | (0.30) |  | 0.95 | *** | (0.30) |
| Residual variance | 1.88 | *** | (0.28) |  | 1.92 | *** | (0.28) |  | 1.94 | *** | (0.28) |
| -2 log-likelihood | 1,783.7 | | |  | 1,781.2 | | |  | 1,784.0 | | |

*Note.* Child (respondent) *N* = 380; Parent *N* = 487. ADL = activities of daily living.

aLog-transformed miles.

**p* < .05. ***p* < .01. ****p* < .001.

Supplementary Table 5

*Multilevel Models for Listening to Talk at Wave 2 with Parent Disability Changes and Other Informal and Paid Help*

|  | Model 1 | | |  | Model 2 | | |  | Model 3 | | |
| --- | --- | --- | --- | --- | --- | --- | --- | --- | --- | --- | --- |
|  | Estimate | | (*SE*) |  | Estimate | | (*SE*) |  | Estimate | | (*SE*) |
| **Fixed effects** |  |  |  |  |  |  |  |  |  |  |  |
| Intercept | 0.61 |  | (1.19) |  | 0.38 |  | (1.19) |  | 0.52 |  | (1.19) |
| Parent ADL changes (at wave 2) | 0.06 |  | (0.06) |  | 0.03 |  | (0.07) |  | -0.01 |  | (0.09) |
| Other help with parent ADL needs |  |  |  |  |  |  |  |  |  |  |  |
| Family members |  |  |  |  | 0.27 |  | (0.17) |  | 0.14 |  | (0.21) |
| Friends or neighbors |  |  |  |  | 0.40 |  | (0.39) |  | 0.47 |  | (0.68) |
| Paid help |  |  |  |  | -0.37 |  | (0.25) |  | 0.00 |  | (0.38) |
| Interactions of parent ADL changes |  |  |  |  |  |  |  |  |  |  |  |
| × Family members |  |  |  |  |  |  |  |  | 0.13 |  | (0.12) |
| × Friends or neighbors |  |  |  |  |  |  |  |  | -0.04 |  | (0.45) |
| × Paid help |  |  |  |  |  |  |  |  | -0.22 |  | (0.16) |
| *Controls* |  |  |  |  |  |  |  |  |  |  |  |
| Parent ADL needs (at wave 1) | -0.17 | * | (0.07) |  | -0.19 | * | (0.08) |  | -0.19 | * | (0.09) |
| Listening to talk (at wave 1) | 0.60 | *** | (0.04) |  | 0.60 | *** | (0.04) |  | 0.60 | *** | (0.04) |
| Demographics |  |  |  |  |  |  |  |  |  |  |  |
| Child: Female | 0.12 |  | (0.14) |  | 0.12 |  | (0.14) |  | 0.12 |  | (0.14) |
| Child: Years of education | -0.05 |  | (0.04) |  | -0.04 |  | (0.04) |  | -0.04 |  | (0.04) |
| Child: Re/married | 0.07 |  | (0.17) |  | 0.09 |  | (0.17) |  | 0.09 |  | (0.17) |
| Child: Employed for pay | 0.03 |  | (0.16) |  | 0.05 |  | (0.16) |  | 0.05 |  | (0.16) |
| Child: Racial/ethnic minority | 0.13 |  | (0.17) |  | 0.13 |  | (0.17) |  | 0.12 |  | (0.17) |
| Child: Number of children | 0.06 |  | (0.05) |  | 0.06 |  | (0.05) |  | 0.05 |  | (0.05) |
| Child: Number of siblings | -0.02 |  | (0.03) |  | -0.03 |  | (0.03) |  | -0.03 |  | (0.03) |
| Parent: Female | 0.33 | * | (0.15) |  | 0.30 | * | (0.15) |  | 0.32 | * | (0.15) |
| Parent: Age | 0.01 |  | (0.01) |  | 0.01 |  | (0.01) |  | 0.01 |  | (0.01) |
| Parent: Years of education | 0.09 | ** | (0.03) |  | 0.09 | ** | (0.03) |  | 0.09 | ** | (0.03) |
| Parent: Re/married | -0.14 |  | (0.15) |  | -0.14 |  | (0.15) |  | -0.13 |  | (0.15) |
| Parent: Coresiding with respondent | 0.80 | ** | (0.29) |  | 0.83 | ** | (0.29) |  | 0.81 | ** | (0.29) |
| Parent: Distance from respondenta | -0.30 | *** | (0.08) |  | -0.29 | *** | (0.08) |  | -0.30 | *** | (0.08) |
| **Random effects** |  |  |  |  |  |  |  |  |  |  |  |
| Intercept variance | 0.22 | * | (2.23) |  | 0.45 | * | (0.23) |  | 0.44 | * | (0.23) |
| Residual variance | 0.22 | *** | (6.80) |  | 1.51 | *** | (0.23) |  | 1.51 | *** | (0.23) |
| -2 log-likelihood | 1,618.7 | | |  | 1,614.8 | | |  | 1,615.8 | | |

*Note.* Child (respondent) *N* = 380; Parent *N* = 487. ADL = activities of daily living.

aLog-transformed miles.

**p* < .05. ***p* < .01. ****p* < .001.

Supplementary Table 6

*Multilevel Models for Socializing at Wave 2 with Parent Disability Changes and Other Informal and Paid Help*

|  | Model 1 | | |  | Model 2 | | |  | Model 3 | | |
| --- | --- | --- | --- | --- | --- | --- | --- | --- | --- | --- | --- |
|  | Estimate | | (*SE*) |  | Estimate | | (*SE*) |  | Estimate | | (*SE*) |
| **Fixed effects** |  |  |  |  |  |  |  |  |  |  |  |
| Intercept | 1.79 |  | (1.25) |  | 1.64 |  | (1.27) |  | 1.75 |  | (1.27) |
| Parent ADL changes (at wave 2) | 0.11 |  | (0.05) |  | 0.13 |  | (0.07) |  | 0.13 |  | (0.09) |
| Other help with parent ADL needs |  |  |  |  |  |  |  |  |  |  |  |
| Family members |  |  |  |  | -0.07 |  | (0.17) |  | -0.06 |  | (0.20) |
| Friends or neighbors |  |  |  |  | 0.21 |  | (0.40) |  | -1.16 |  | (0.69) |
| Paid help |  |  |  |  | -0.19 |  | (0.25) |  | -0.23 |  | (0.37) |
| Interactions of parent ADL changes |  |  |  |  |  |  |  |  |  |  |  |
| × Family members |  |  |  |  |  |  |  |  | -0.01 |  | (0.11) |
| × Friends or neighbors |  |  |  |  |  |  |  |  | 1.11 |  | (0.56) |
| × Paid help |  |  |  |  |  |  |  |  | 0.02 |  | (0.15) |
| *Controls* |  |  |  |  |  |  |  |  |  |  |  |
| Parent ADL needs (at wave 1) | 0.06 |  | (0.07) |  | 0.09 |  | (0.08) |  | 0.10 |  | (0.08) |
| Socializing (at wave 1) | 0.46 | *** | (0.05) |  | 0.46 | *** | (0.05) |  | 0.47 | *** | (0.05) |
| Demographics |  |  |  |  |  |  |  |  |  |  |  |
| Child: Female | 0.06 |  | (0.15) |  | 0.05 |  | (0.16) |  | 0.06 |  | (0.15) |
| Child: Years of education | -0.02 |  | (0.04) |  | -0.02 |  | (0.04) |  | -0.03 |  | (0.04) |
| Child: Re/married | 0.00 |  | (0.18) |  | 0.01 |  | (0.18) |  | -0.01 |  | (0.18) |
| Child: Employed for pay | 0.17 |  | (0.17) |  | 0.17 |  | (0.17) |  | 0.21 |  | (0.17) |
| Child: Racial/ethnic minority | 0.05 |  | (0.18) |  | 0.06 |  | (0.19) |  | 0.04 |  | (0.18) |
| Child: Number of children | 0.08 |  | (0.05) |  | 0.08 |  | (0.05) |  | 0.08 |  | (0.05) |
| Child: Number of siblings | -0.05 |  | (0.04) |  | -0.05 |  | (0.04) |  | -0.05 |  | (0.04) |
| Parent: Female | 0.15 |  | (0.12) |  | 0.15 |  | (0.13) |  | 0.14 |  | (0.13) |
| Parent: Age | 0.00 |  | (0.01) |  | 0.01 |  | (0.01) |  | 0.00 |  | (0.01) |
| Parent: Years of education | 0.04 |  | (0.03) |  | 0.04 |  | (0.03) |  | 0.05 |  | (0.03) |
| Parent: Re/married | -0.17 |  | (0.16) |  | -0.17 |  | (0.16) |  | -0.20 |  | (0.16) |
| Parent: Coresiding with respondent | 1.16 | *** | (0.28) |  | 1.15 | *** | (0.28) |  | 1.08 | *** | (0.28) |
| Parent: Distance from respondenta | -0.47 | *** | (0.09) |  | -0.48 | *** | (0.09) |  | -0.48 | *** | (0.09) |
| **Random effects** |  |  |  |  |  |  |  |  |  |  |  |
| Intercept variance | 1.28 | *** | (0.19) |  | 1.29 | *** | (0.19) |  | 1.27 | *** | (0.19) |
| Residual variance | 0.85 | *** | (0.13) |  | 0.86 | *** | (0.13) |  | 0.86 | *** | (0.13) |
| -2 log-likelihood | 1,627.7 | | |  | 1,629.4 | | |  | 1,627.7 | | |

*Note.* Child (respondent) *N* = 380; Parent *N* = 487. ADL = activities of daily living.

aLog-transformed miles.

**p* < .05. ***p* < .01. ****p* < .001.

Supplementary Table 7

*Regression Models Predicting Offspring’s Well-Being at Wave 2 with Parent Disability Changes*

|  | Depressive symptoms | | | | | | |  | Life satisfaction | | | | | | |
| --- | --- | --- | --- | --- | --- | --- | --- | --- | --- | --- | --- | --- | --- | --- | --- |
|  | Model 1 | | |  | Model 2 | | |  | Model 1 | | |  | Model 2 | | |
|  | Estimate | | (*SE*) |  | Estimate | | (*SE*) |  | Estimate | | (*SE*) |  | Estimate | | (*SE*) |
| Fixed effects |  |  |  |  |  |  |  |  |  |  |  |  |  |  |  |
| Intercept | 1.92 | *** | (0.32) |  | 1.94 | *** | (0.34) |  | 1.14 |  | (0.74) |  | 1.05 |  | (0.76) |
| Parent ADL changes (at wave 2) | 0.01 |  | (0.03) |  | 0.01 |  | (0.04) |  | 0.04 |  | (0.06) |  | 0.06 |  | (0.09) |
| Help with parent ADL needsa |  |  |  |  | 0.00 |  | (0.02) |  |  |  |  |  | -0.01 |  | (0.05) |
| Other help with parent ADL needs |  |  |  |  |  |  |  |  |  |  |  |  |  |  |  |
| Family members |  |  |  |  | -0.03 |  | (0.08) |  |  |  |  |  | 0.00 |  | (0.19) |
| Friends or neighbors |  |  |  |  | -0.12 |  | (0.19) |  |  |  |  |  | 0.22 |  | (0.44) |
| Paid help |  |  |  |  | 0.03 |  | (0.11) |  |  |  |  |  | -0.23 |  | (0.27) |
| *Controls* |  |  |  |  |  |  |  |  |  |  |  |  |  |  |  |
| Parent ADL needs (at wave 1) | -0.00 |  | (0.03) |  | -0.00 |  | (0.04) |  | -0.04 |  | (0.07) |  | -0.02 |  | (0.09) |
| Well-being (at wave 1) | 0.46 | *** | (0.06) |  | 0.46 | *** | (0.06) |  | 0.52 | *** | (0.05) |  | 0.52 | *** | (0.05) |
| Demographics |  |  |  |  |  |  |  |  |  |  |  |  |  |  |  |
| Child: Female | -0.01 |  | (0.06) |  | -0.01 |  | (0.06) |  | 0.07 |  | (0.15) |  | 0.06 |  | (0.16) |
| Child: Years of education | -0.03 |  | (0.02) |  | -0.03 |  | (0.02) |  | 0.04 |  | (0.04) |  | 0.05 |  | (0.04) |
| Child: Re/married | -0.05 |  | (0.08) |  | -0.05 |  | (0.08) |  | 0.14 |  | (0.19) |  | 0.15 |  | (0.19) |
| Child: Employed for pay | -0.12 |  | (0.07) |  | -0.12 |  | (0.07) |  | -0.11 |  | (0.18) |  | -0.11 |  | (0.18) |
| Child: Racial/ethnic minority | -0.24 | ** | (0.07) |  | -0.24 | ** | (0.08) |  | 0.19 |  | (0.18) |  | 0.20 |  | (0.18) |
| Child: Number of children | -0.01 |  | (0.02) |  | -0.01 |  | (0.02) |  | 0.06 |  | (0.05) |  | 0.06 |  | (0.05) |
| Child: Number of parents | -0.06 |  | (0.07) |  | -0.06 |  | (0.07) |  | -0.13 |  | (0.17) |  | -0.14 |  | (0.17) |
| Child: Self-rated health | -0.13 | *** | (0.04) |  | -0.13 | *** | (0.04) |  | 0.48 | *** | (0.09) |  | 0.49 | *** | (0.09) |
| *F* | 11.59*** | | |  | 8.48*** | | |  | 19.45*** | | |  | 14.21*** | | |
| Adjusted *R*2 | .24 | | |  | .23 | | |  | .35 | | |  | .35 | | |

*Note.* Child (respondent) *N* = 380. ADL = activities of daily living.

aHelp respondent offspring provided to parents; rated 1 = *less than once per year* to 8 = *daily*.

**p* < .05. ***p* < .01. ****p* < .001.
